# Supplementary material for: Multi-Stress Induction of the Mycobacterium tuberculosis MbcTA Bactericidal Toxin-Antitoxin System
Source: PubMed Central journal article supplement (PMC7291234; doi:10.3390/toxins12050329), 2020-05-16
Supplement: toxins-12-00329-s001.pdf [file toxins-12-00329-s001.pdf]

# Supplementary Materials: Multi-stress induction of the *Mycobacterium tuberculosis* MbcTA bactericidal toxin-antitoxin system

Kanchiyaphat Ariyachaokun, Anna D. Grabowska, Claude Gutierrez and Olivier Neyrolles

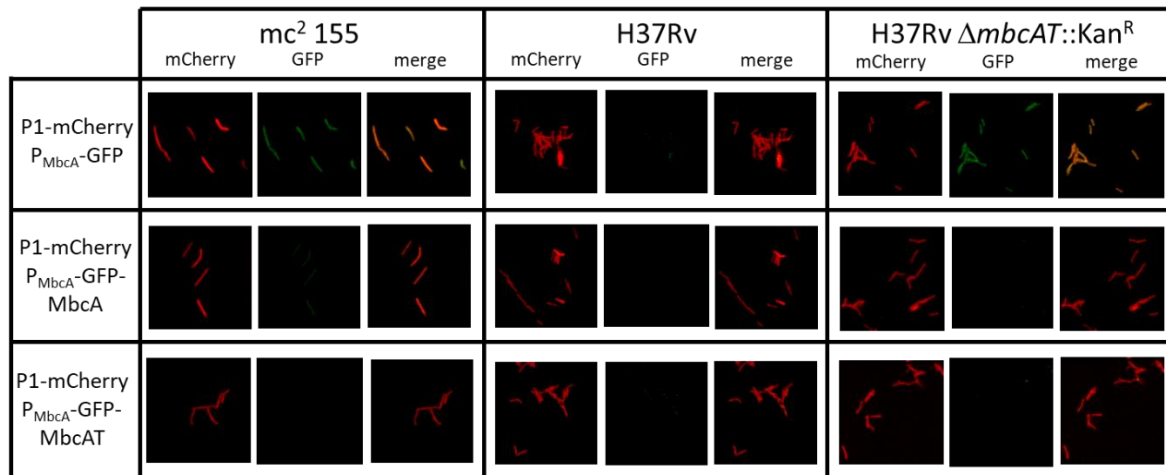

**Figure S1.** Auto-repression of the *mbcAT* operon expression in *M. smegmatis* and *M. tuberculosis*. Wild type *M. smegmatis* mc<sup>2</sup> 155 (left), wild type *M. tuberculosis* H37Rv (center) or mutant *M. tuberculosis* H37Rv  $\Delta$ mbcAT::Kan<sup>R</sup> (right) harboring plasmid pGMCS-P1-mCherry-P<sub>MbcA</sub>GFP, pGMCS-P1-mCherry-P<sub>MbcA</sub>GFP-*mbcA* or pGMCS-P1-mCherry-P<sub>MbcA</sub>GFP-*mbcAT*, as indicated, were grown to exponential phase in complete 7H9 medium supplemented with streptomycin. Samples of the cells were fixed with 4% *p*-formaldehyde and observed in fluorescence microscopy using large field leica DMIRB, at magnification of 630 $\times$ .

**Table S1.** Primers used for plasmid constructions.

| Construction /DNA Fragment             | Template             | Primers                    | Sequence 5'-3'                                                    |
|----------------------------------------|----------------------|----------------------------|-------------------------------------------------------------------|
| <b>pEN41A-P1-GFP</b>                   |                      |                            |                                                                   |
| P1                                     | pEN12A-P1            | Fw-GRFP-SD-P1              | GCTCACCATGGTGAATCCTCCTCAT<br>TTCGGGCGGCGAATCTC                    |
|                                        |                      | Rev-B1-P1                  | GGGACTGCTTTTTTGTACAAACTTGG<br>GCGGCACGATCCGCGACGTG                |
| GFP ORF                                | pLAM12:: GFP         | Fw-B4-GFP                  | GGGACAACCTTTGTATAGAAAAGTTGT<br>TACTTGTACAGCTCGTCCATG              |
|                                        |                      | Rv-SD-GRFP                 | AGGAGGATTCACCATGGTGAGCAAGG<br>GCGAGGAG                            |
| <b>pEN41A-P1-mCherry</b>               |                      |                            |                                                                   |
| P1                                     | pEN12A-P1            | Fw-GRFP-SD-P1              | GCTCACCATGGTGAATCCTCCTCAT<br>TTCGGGCGGCGAATCTC                    |
|                                        |                      | Rv-B1-P1                   | GGGACTGCTTTTTTGTACAAACTTGG<br>GCGGCACGATCCGCGACGTG                |
| mCherry ORF                            | pLAM12:: mCherry     | Fw-B4-GRFP                 | GGGACAACCTTTGTATAGAAAAGTTGT<br>TACTTGTACAGCTCGTCCATGCCG           |
|                                        |                      | Rv-SD-GRFP                 | AGGAGGATTCACCATGGTGAGCAAGG<br>GCGAGGAG                            |
| <b>pEN41A-P1-mTurquoise</b>            |                      |                            |                                                                   |
| P1                                     | pEN12A-P1            | Fw-mTurq-SD-P1             | GCTGACCATGGTGAATCCTCCTCAT<br>TTCGGGCGGCGAATCTC                    |
|                                        |                      | Rv-B1-P1                   | GGGACTGCTTTTTTGTACAAACTTGG<br>GCGGCACGATCCGCGACGTG                |
| mTurquoise ORF                         | pJYB 240- mTurquoise | Fw-B4-mTurq                | GGGACAACCTTTGTATAGAAAAGTTGT<br>TACTTGTAGAGTTCGTCCATGCCG           |
|                                        |                      | Rv-SD-mTurq                | AGGAGGATTCACCATGGTCAGCAAGG<br>GTGAGGAACTC                         |
| <b>pEN41A-P1-mVenus</b>                |                      |                            |                                                                   |
| P1                                     | pEN12A-P1            | Fw-GRFP-SD-P1              | GCTCACCATGGTGAATCCTCCTCAT<br>TTCGGGCGGCGAATCTC                    |
|                                        |                      | Rv-B1-P1                   | GGGACTGCTTTTTTGTACAAACTTGG<br>GCGGCACGATCCGCGACGTG                |
| mVenus ORF                             | pJYB 234- mVenus     | Fw-B4-GFP                  | GGGACAACCTTTGTATAGAAAAGTTGT<br>TACTTGTACAGCTCGTCCATG              |
|                                        |                      | Rv-SD-GRFP                 | AGGAGGATTCACCATGGTGAGCAAGG<br>GCGAGGAG                            |
| <b>pEN12A-P<sub>mbcA</sub>-GFP</b>     |                      |                            |                                                                   |
| P <sub>mbcA(261)</sub>                 | H37Rv DNA            | Fw-B1-P <sub>mbcA</sub>    | GGGACAAGTTTGTACAAAAAAGCAG<br>GCTGCTGCTGGCTCCCAGTAGAC              |
|                                        |                      | Rv-GRFP-P <sub>mbcA</sub>  | GCTCACCATGGTGAATCCTCCTCCGGG<br>CAGCCTGTCTTCCTTTTG                 |
| GFP ORF                                | pLAM12::GFP          | Fw-P <sub>mbcA</sub> -GRFP | CAAAAGGAAGACAGGCTGCCCGGAG<br>GAGGATTCACCATGGTGAGCAAGGGC<br>GAGGAG |
|                                        |                      | Rv-B2-GRFP                 | GGGACCACTTTGTACAAGAAAGCTG<br>GGTTACTTGTACAGCTCGTCCATG             |
| <b>pEN12A-P<sub>mbcA</sub>-mCherry</b> |                      |                            |                                                                   |

|                                                  |                                              |                                    |                                                                      |
|--------------------------------------------------|----------------------------------------------|------------------------------------|----------------------------------------------------------------------|
| <i>P<sub>mbcA(261)</sub></i>                     | H37Rv DNA                                    | Fw-B1- <i>P<sub>mbcA</sub></i>     | GGGGACAAGTTTGTACAAAAAAGCAG<br>GCTGCTGCTGGCTCCCAGTAGAC                |
|                                                  |                                              | Rv-GRFP- <i>P<sub>mbcA</sub></i>   | GCTCACCATGGTGAATCCTCCTCCGGG<br>CAGCCTGTCTTCCTTTTG                    |
| GFP ORF                                          | pLAM12::<br>mCherry                          | Fw- <i>P<sub>mbcA</sub></i> -GRFP  | CAAAAGGAAGACAGGCTGCCCCGAG<br>GAGGATTCACCATGGTGAGCAAGGGC<br>GAGGAG    |
|                                                  |                                              | Rv-B2-GRFP                         | GGGGACCACTTTGTACAAGAAAGCTG<br>GGTTACTTGTACAGCTCGTCCATG               |
| <b>pEN12A-<i>P<sub>mbcA</sub></i>-mTurquoise</b> |                                              |                                    |                                                                      |
| <i>P<sub>mbcA(261)</sub></i>                     | H37Rv DNA                                    | Fw-B1- <i>P<sub>mbcA</sub></i>     | GGGGACAAGTTTGTACAAAAAAGCAG<br>GCTGCTGCTGGCTCCCAGTAGAC                |
|                                                  |                                              | Rv-mTurq- <i>P<sub>mbcA</sub></i>  | GCTGACCATGGTGAATCCTCCTCCGGG<br>CAGCCTGTCTTCCTTTTG                    |
| mVenus ORF                                       | pJYB 234-<br>mTurquoise                      | Fw- <i>P<sub>mbcA</sub></i> -mTurq | CAAAAGGAAGACAGGCTGCCCCGAG<br>GAGGATTCACCATGGTCAGCAAGGGT<br>GAGGAACTC |
|                                                  |                                              | Rv-B2-mTurq                        | GGGGACCACTTTGTACAAGAAAGCTG<br>GGTTACTTGTAGAGTTCGTCCATGCC<br>G        |
| <b>pEN12A-<i>P<sub>mbcA</sub></i>-mVenus</b>     |                                              |                                    |                                                                      |
| <i>P<sub>mbcA(261)</sub></i>                     | H37Rv DNA                                    | Fw-B1- <i>P<sub>mbcA</sub></i>     | GGGGACAAGTTTGTACAAAAAAGCAG<br>GCTGCTGCTGGCTCCCAGTAGAC                |
|                                                  |                                              | Rv-GRFP- <i>P<sub>mbcA</sub></i>   | GCTCACCATGGTGAATCCTCCTCCGGG<br>CAGCCTGTCTTCCTTTTG                    |
| mVenus ORF                                       | pJYB 234-<br>mVenus                          | Fw- <i>P<sub>mbcA</sub></i> -GRFP  | CAAAAGGAAGACAGGCTGCCCCGAG<br>GAGGATTCACCATGGTGAGCAAGGGC<br>GAGGAG    |
|                                                  |                                              | Rv-B2-GRFP                         | GGGGACCACTTTGTACAAGAAAGCTG<br>GGTTACTTGTACAGCTCGTCCATG               |
| <b>pEN12A-<i>P<sub>mbcA(103)</sub></i>-GFP</b>   |                                              |                                    |                                                                      |
| <i>P<sub>mbcA(103)</sub></i> -GFP                | pEN12A-<br><i>P<sub>mbcA(261)</sub></i> -GFP | Fw2-B1- <i>P<sub>mbcA</sub></i>    | GGGGACAAGTTTGTACAAAAAAGCAG<br>GCTCCGAAACTGAATGCCCATCG                |
|                                                  |                                              | Rv-B2-GRFP                         | GGGGACCACTTTGTACAAGAAAGCTG<br>GGTTACTTGTACAGCTCGTCCATG               |
| <b>pEN12A-<i>P<sub>mbcA(239)</sub></i>-GFP</b>   |                                              |                                    |                                                                      |
| <i>P<sub>mbcA(239)</sub></i>                     | pEN12A-<br><i>P<sub>mbcA(261)</sub></i> -GFP | Fw-B1- <i>P<sub>mbcA</sub></i>     | GGGGACAAGTTTGTACAAAAAAGCAG<br>GCTGCTGCTGGCTCCCAGTAGAC                |
|                                                  |                                              | Rv-GRFP- <i>P<sub>mbcA</sub></i>   | GCTCACCATGGTGAATCCTCCTCCCTA<br>TTGATTTGTCATGTATTATGACACGAA<br>CCGAGG |
| GFP ORF                                          | pLAM12::<br>GFP                              | Fw2- <i>P<sub>mbcA</sub></i> -GFP  | ACATGACAAATCAATAGGGAGGAGGA<br>TTCACCATGGTGAGCAAGGGCGAGGA<br>G        |
|                                                  |                                              | Rv-B2-GRFP                         | GGGGACCACTTTGTACAAGAAAGCTG<br>GGTTACTTGTACAGCTCGTCCATG               |
| <b>pEN12A-<i>P<sub>mbcA(239-G)</sub></i>-GFP</b> |                                              |                                    |                                                                      |
| <i>P<sub>mbcA(239-G)</sub></i>                   | pEN12A-<br><i>P<sub>mbcA(261)</sub></i> -GFP | Fw-B1- <i>P<sub>mbcA</sub></i>     | GGGGACAAGTTTGTACAAAAAAGCAG<br>GCTGCTGCTGGCTCCCAGTAGAC                |

|                                                                             |                                                                |                                       |                                                                      |
|-----------------------------------------------------------------------------|----------------------------------------------------------------|---------------------------------------|----------------------------------------------------------------------|
|                                                                             |                                                                | Rv3-GFP-P <sub>mbcA</sub>             | GCTCACCATGGTGAATCCTCCTCCCTA<br>TTGATTTGTCATGTGTTATGACACGAA<br>CCGAGG |
| GFP ORF                                                                     | pLAM12:: GFP                                                   | Fw2-P <sub>mbcA</sub> -GFP            | ACATGACAAATCAATAGGGAGGAGGA<br>TTCACCATGGTGAGCAAGGGCGAGGA<br>G        |
|                                                                             |                                                                | Rv-B2-GRFP                            | GGGGACCACTTTGTACAAGAAAGCTG<br>GGTTACTTGTACAGCTCGTCCATG               |
| <b>pGMCS-P1-mCherry-P<sub>mbcA</sub>(Mut1)-GFP-mbcA</b>                     |                                                                |                                       |                                                                      |
| Mutated<br>linear<br>plasmid                                                | pGMCS-P1-<br>mCherry-<br>P <sub>mbcA</sub> (261)- <i>mbcA</i>  | Inf-P <sub>mbcA</sub> -right          | GGCTGCCCGGAGGAGGATTC                                                 |
|                                                                             |                                                                | Inf-P <sub>mbcA</sub> -Mut1-<br>left  | CTCCTCCGGGCAGCCTGTCTTCCTACG<br>ATCTATTGATTTGTCATG                    |
| <b>pGMCS-P1-mCherry-P<sub>mbcA</sub>(Mut2)-GFP-mbcA</b>                     |                                                                |                                       |                                                                      |
| Mutated<br>linear<br>plasmid                                                | pGMCS-P1-<br>mCherry-<br>P <sub>mbcA</sub> (261)- <i>mbcA</i>  | Inf-P <sub>mbcA</sub> -right          | GGCTGCCCGGAGGAGGATTC                                                 |
|                                                                             |                                                                | Inf-P <sub>mbcA</sub> Mut2-<br>left - | CTCCTCCGGGCAGCCCACCTTCCTTTT<br>GTCTATTGATTTG                         |
| <b>pGMCS-P1-mCherry-P<sub>mbcA</sub>(Mut1)-GFP</b>                          |                                                                |                                       |                                                                      |
| Mutated<br>linear<br>plasmid                                                | pGMCS-P1-<br>mCherry-<br>P <sub>mbcA</sub> (Mut1)- <i>mbcA</i> | Inf-del <i>mbcA</i> -right            | GGGAGTGTTTCGTGTGAGCTG                                                |
|                                                                             |                                                                | Inf-del <i>mbcA</i> -left             | CACACGAACACTCCCGAGGCGAGCAC<br>ATTACTCCC                              |
| <b>pGMCS-P1-mCherry-P<sub>mbcA</sub>(Mut2)-GFP</b>                          |                                                                |                                       |                                                                      |
| Mutated<br>linear<br>plasmid                                                | pGMCS-P1-<br>mCherry-<br>P <sub>mbcA</sub> (Mut2)- <i>mbcA</i> | Inf-del <i>mbcA</i> -right            | GGGAGTGTTTCGTGTGAGCTG                                                |
|                                                                             |                                                                | Inf-del <i>mbcA</i> -left             | CACACGAACACTCCCGAGGCGAGCAC<br>ATTACTCCC                              |
| <b>pGMCS-P1-mCherry-P<sub>mbcA</sub>(261)-<i>mbcA</i>(R33E)</b>             |                                                                |                                       |                                                                      |
| Mutated<br>linear<br>plasmid                                                | pGMCS-P1-<br>mCherry-<br>P <sub>mbcA</sub> (261)- <i>mbcA</i>  | Inf- <i>mbcA</i> -R33E-<br>right      | GTCGATGCCTCGCCGGAGTCCGTGGC<br>GCGATGGACCGC                           |
|                                                                             |                                                                | Inf- <i>mbcA</i> -R33E-<br>left       | CGGCGAGGCATCGACGATG                                                  |
| <b>pGMCS-P1-mCherry-P<sub>mbcA</sub>(261)-<i>mbcA</i>(R33E)-<i>mbcT</i></b> |                                                                |                                       |                                                                      |
| Mutated<br>linear<br>plasmid                                                | pGMCS-P1-<br>mCherry-<br>P <sub>mbcA</sub> (261)- <i>mbcAT</i> | Inf- <i>mbcA</i> -R33E-<br>right      | GTCGATGCCTCGCCGGAGTCCGTGGC<br>GCGATGGACCGC                           |
|                                                                             |                                                                | Inf- <i>mbcA</i> -R33E-<br>left       | CGGCGAGGCATCGACGATG                                                  |
| <b>pGMCS-P1-mCherry-P<sub>mbcA</sub>(261)-<i>mbcA</i>(R37E)</b>             |                                                                |                                       |                                                                      |
| Mutated<br>linear<br>plasmid                                                | pGMCS-P1-<br>mCherry-<br>P <sub>mbcA</sub> (261)- <i>mbcA</i>  | Inf- <i>mbcA</i> -R37E-<br>right      | CCGCGTTCCGTGGCGGAGTGGACCGC<br>AGGTCAGGTGG                            |
|                                                                             |                                                                | Inf- <i>mbcA</i> -R37E-<br>left       | CGCCACGGAACGCGGCGAG                                                  |

Table S2. Plasmids used in this work.

| Name                                                                            | Reference/Origin                                                        | Construction/Properties                                                                                                                                                                         |
|---------------------------------------------------------------------------------|-------------------------------------------------------------------------|-------------------------------------------------------------------------------------------------------------------------------------------------------------------------------------------------|
| pDE43-MCS                                                                       | D. Schnappinger<br>(Weill Cornell Medical<br>College, New York,<br>USA) | Destination vector for Gateway cloning. Strepto <sup>R</sup>                                                                                                                                    |
| pDO221A                                                                         | D. Schnappinger                                                         | Destination vector to construct pEN12 entry<br>plasmids for Gateway cloning. Amp <sup>R</sup>                                                                                                   |
| pDO23A                                                                          | D. Schnappinger                                                         | Destination vector to construct pEN23 entry<br>plasmids for Gateway cloning. Amp <sup>R</sup>                                                                                                   |
| pDO41A                                                                          | D. Schnappinger                                                         | Destination vector to construct pEN41 entry<br>plasmids for Gateway cloning. Amp <sup>R</sup>                                                                                                   |
| pEN12A-P1                                                                       | D. Schnappinger                                                         | Middle entry clone for Gateway cloning.<br>Template for amplification of P1 promoter.<br>Amp <sup>R</sup>                                                                                       |
| pEN12A-P606Pld                                                                  | D. Schnappinger                                                         | Middle entry clone for Gateway cloning. Amp <sup>R</sup>                                                                                                                                        |
| pEN12A-P606                                                                     | D. Schnappinger                                                         | Middle entry clone for Gateway cloning. Amp <sup>R</sup>                                                                                                                                        |
| pEN12A-P <sub>mbcA</sub> -<br>reporter                                          | This study                                                              | Gateway cloning into pDO221A. Middle entry<br>clone for Gateway cloning. Reporter can be GFP,<br>mCherry, mTurquoise or mVenus. Amp <sup>R</sup>                                                |
| pEN23A-Mlu1                                                                     | D. Schnappinger                                                         | Empty 5' entry clone for Gateway cloning.<br>Amp <sup>R</sup>                                                                                                                                   |
| pEN23A- <i>mbcT</i>                                                             | [1]                                                                     | 5' entry clone for Gateway cloning. Amp <sup>R</sup>                                                                                                                                            |
| pEN23A- <i>mbcAT</i>                                                            | [1]                                                                     | 5' entry clone for Gateway cloning. Amp <sup>R</sup>                                                                                                                                            |
| pEN41-TetR                                                                      | D. Schnappinger                                                         | 3' entry clone for Gateway cloning. Amp <sup>R</sup>                                                                                                                                            |
| pEN41A-P1-reporter                                                              | This study                                                              | Gateway cloning into pDO41A. 3' entry clone<br>for Gateway cloning. Reporter can be GFP,<br>mCherry, mTurquoise or mVenus. Amp <sup>R</sup>                                                     |
| pGMCS-P1-<br>mCherry-P <sub>mbcA</sub> -GFP                                     | This study                                                              | Gateway cloning. Reporter of P <sub>mbcA</sub> expression<br>(261-bp Fw1/Rv1 DNA fragment). Integrates at<br>the L5 mycobacteriophage integration site in<br>mycobacteria. Strepto <sup>R</sup> |
| pGMCS-P1-<br>mCherry-P <sub>mbcA</sub> -GFP-<br><i>mbcA</i>                     | This study                                                              | Gateway cloning. Reporter of P <sub>mbcA</sub> expression<br>(261-bp Fw1/Rv1 DNA fragment). Integrates at<br>the L5 mycobacteriophage integration site in<br>mycobacteria. Strepto <sup>R</sup> |
| pGMCS-P1-<br>mCherry-P <sub>mbcA</sub> -GFP-<br><i>mbcAT</i>                    | This study                                                              | Gateway cloning. Reporter of P <sub>mbcA</sub> expression<br>(261-bp Fw1/Rv1 DNA fragment). Integrates at<br>the L5 mycobacteriophage integration site in<br>mycobacteria. Strepto <sup>R</sup> |
| pGMCS-P1-<br>mCherry-P <sub>mbcA</sub> -GFP-<br><i>mbcA</i> (R33E)              | This study                                                              | Site directed mutagenesis of pGMCS-P1-<br>mCherry-P <sub>mbcA</sub> -GFP- <i>mbcA</i> . Strepto <sup>R</sup>                                                                                    |
| pGMCS-P1-<br>mCherry-P <sub>mbcA</sub> -GFP-<br><i>mbcA</i> (R37E)              | This study                                                              | Site directed mutagenesis of pGMCS-P1-<br>mCherry-P <sub>mbcA</sub> -GFP- <i>mbcA</i> . Strepto <sup>R</sup>                                                                                    |
| pGMCS-P1-<br>mCherry-P <sub>mbcA</sub> -GFP-<br><i>mbcA</i> (R33E)- <i>mbcT</i> | This study                                                              | Site directed mutagenesis of pGMCS-P1-<br>mCherry-P <sub>mbcA</sub> -GFP- <i>mbcAT</i> . Strepto <sup>R</sup>                                                                                   |

|                                                            |                                               |                                                                                                                                                                                        |
|------------------------------------------------------------|-----------------------------------------------|----------------------------------------------------------------------------------------------------------------------------------------------------------------------------------------|
| pGMCS-P1-mCherry-P <sub>mbcA(103)</sub> -GFP               | This study                                    | Gateway cloning. Reporter of P <sub>mbcA</sub> expression (103-bp Fw2/Rv1 DNA fragment). Integrates at the L5 mycobacteriophage integration site in mycobacteria. Strepto <sup>R</sup> |
| pGMCS-P1-mCherry-P <sub>mbcA(103)</sub> -GFP- <i>mbcA</i>  | This study                                    | Gateway cloning. Reporter of P <sub>mbcA</sub> expression (103-bp Fw2/Rv1 DNA fragment). Integrates at the L5 mycobacteriophage integration site in mycobacteria. Strepto <sup>R</sup> |
| pGMCS-P1-mCherry-P <sub>mbcA(239)</sub> -GFP               | This study                                    | Gateway cloning. Reporter of P <sub>mbcA</sub> expression (239-bp Fw1/Rv2 DNA fragment). Integrates at the L5 mycobacteriophage integration site in mycobacteria. Strepto <sup>R</sup> |
| pGMCS-P1-mCherry-P <sub>mbcA(239)</sub> -GFP- <i>mbcA</i>  | This study                                    | Gateway cloning. Reporter of P <sub>mbcA</sub> expression (239-bp Fw1/Rv2 DNA fragment). Integrates at the L5 mycobacteriophage integration site in mycobacteria. Strepto <sup>R</sup> |
| pGMCS-P1-mCherry-P <sub>mbcA(239-G)</sub> -GFP             | This study                                    | Gateway cloning. Reporter of P <sub>mbcA</sub> expression (239-bp Fw1/Rv3 DNA fragment). Integrates at the L5 mycobacteriophage integration site in mycobacteria. Strepto <sup>R</sup> |
| pGMCS-P1-mCherry-P <sub>mbcA(Mut1)</sub> -GFP- <i>mbcA</i> | This study                                    | Site-directed mutagenesis of pGMCS-P1-mCherry-P <sub>mbcA</sub> -GFP- <i>mbcA</i> . Strepto <sup>R</sup>                                                                               |
| pGMCS-P1-mCherry-P <sub>mbcA(Mut1)</sub> -GFP              | This study                                    | Site-directed mutagenesis of pGMCS-P1-mCherry-P <sub>mbcA(Mut1)</sub> -GFP- <i>mbcA</i> . Strepto <sup>R</sup>                                                                         |
| pGMCS-P1-mCherry-P <sub>mbcA(Mut2)</sub> -GFP- <i>mbcA</i> | This study                                    | Site-directed mutagenesis of pGMCS-P1-mCherry-P <sub>mbcA</sub> -GFP- <i>mbcA</i> . Strepto <sup>R</sup>                                                                               |
| pGMCS-P1-mCherry-P <sub>mbcA(Mut2)</sub> -GFP              | This study                                    | Site-directed mutagenesis of pGMCS-P1-mCherry-P <sub>mbcA(Mut2)</sub> -GFP- <i>mbcA</i> . Strepto <sup>R</sup>                                                                         |
| pGMCS-P1-mTurquoise-P <sub>mbcA</sub> -mVenus              | This study                                    | Gateway cloning. Reporter of P <sub>mbcA</sub> expression. Integrates at the L5 mycobacteriophage integration site in mycobacteria. Strepto <sup>R</sup>                               |
| pGMCS-TetR-P1- <i>mbcT</i>                                 | [1]                                           | Allow tetracycline-inducible expression of <i>mbcT</i> . Integrates at the L5 mycobacteriophage integration site in mycobacteria. Strepto <sup>R</sup>                                 |
| pGMCS-TetR-P606P1d- <i>mbcT</i>                            | This study                                    | Allow tetracycline-inducible expression of <i>mbcT</i> . Integrates at the L5 mycobacteriophage integration site in mycobacteria. Strepto <sup>R</sup>                                 |
| pGMCS-TetR-P606- <i>mbcT</i>                               | This study                                    | Allow tetracycline-inducible expression of <i>mbcT</i> . Integrates at the L5 mycobacteriophage integration site in mycobacteria. Strepto <sup>R</sup>                                 |
| pJYB 240-mTurq                                             | J.Y. Bouet & J. Rech (LMGM, Toulouse, France) | Template for amplification of <i>mTurquoise</i> by PCR                                                                                                                                 |
| pJYB 234-mVenus                                            | J.Y. Bouet & J. Rech                          | Template for amplification of <i>mVenus</i> by PCR                                                                                                                                     |
| pLAM12::GFP                                                | [39]                                          | Template for amplification of <i>egfp</i> by PCR.                                                                                                                                      |
| pLAM12::mCherry                                            | [39]                                          | Template for amplification of <i>mCherry</i> by PCR                                                                                                                                    |
